# Supplementary material for: Sedentary Time is Associated with Worse Attention in Parkinson’s Disease: A Pilot Study
Source: PubMed Central journal article supplement — J Mov Disord. 2020 May 29;13(2):146–9. doi: 10.14802/jmd.20015 (PMC7280940; doi:10.14802/jmd.20015), 2020-05-29
Supplement: jmd-20015-suppl2.pdf [file jmd-20015-suppl2.pdf]

**Supplementary Table 1.** Correlation between olfactory function (CCSIT score) and neuropsychological performance

| Neuropsychological items | Correlation coefficient | <i>p</i> value | Q-value |
|--------------------------|-------------------------|----------------|---------|
| Digit span forward       | 0.011                   | 0.876          | 0.876   |
| Digit span backward      | 0.086                   | 0.205          | 0.279   |
| K-BNT                    | 0.258                   | < 0.001        | 0.002   |
| RCFT copy                | 0.061                   | 0.372          | 0.364   |
| SVLT immediate recall    | 0.147                   | 0.030          | 0.084   |
| SVLT delayed recall      | 0.056                   | 0.407          | 0.436   |
| SVLT recognition         | 0.178                   | 0.009          | 0.043   |
| RCFT immediate recall    | 0.104                   | 0.125          | 0.208   |
| RCFT delayed recall      | 0.106                   | 0.120          | 0.208   |
| RCFT recognition         | 0.107                   | 0.114          | 0.208   |
| COWAT semantic           | 0.144                   | 0.033          | 0.084   |
| COWAT phonemic           | 0.072                   | 0.291          | 0.364   |
| Stroop color reading     | 0.188                   | 0.005          | 0.041   |
| Total K-MMSE score       | 0.098                   | 0.159          | 0.239   |
| CDR-SOB                  | -0.165                  | 0.015          | 0.056   |

Data are results of partial correlation analysis using age, sex, and interval from PD onset to CCSIT evaluation as covariates. Q-value is a *p*-value that is adjusted for the false discovery rate. CCSIT: Cross-Cultural Smell Identification Test, CDR-SOB: Clinical Dementia Rating Sum of Boxes, COWAT: Controlled Oral Word Association Test, K-BNT: Korean version of the Boston Naming Test, K-MMSE: Korean version of the Mini-Mental State Examination, RCFT: Rey-Osterrieth Complex Figure Test, SVLT: Seoul Verbal Learning Test.
